# Supplementary material for: 3D Co(ii) coordination polymer with ferrimagnetic-like layers based on azide and tetrazolate bridges showing slow magnetic dynamics
Source: Royal Society of Chemistry journal article supplement (doi:10.1039/c4dt03332a), 2014-11-21
Supplement: c4dt03332a1.pdf [file c4dt03332a1.pdf]

## Electronic supplementary information (ESI)

### 3D Co(II) coordination polymer with ferrimagnetic-like layers based on azide and tetrazolate bridges showing slow magnetic dynamics

Xiu-Mei Zhang,\* Peng Li, Wei Gao, and Jie-Ping Liu and En-Qing Gao

**Synthesis:** A mixture of  $\text{CoCl}_2 \cdot 6\text{H}_2\text{O}$  (0.095 g, 0.4 mmol), 4-cyanopyridine (0.036 g, 0.3 mmol) and  $\text{NaN}_3$  (0.052 g, 0.8 mmol) in distilled water (15 mL) was stirred for 20 min in air and then heated in a 23 mL Teflon-lined autoclave at 150 °C for 2 days. After cooling to room temperature, red block crystals of **1** were collected in a 53% yield based on Co. Anal. Calcd for  $\text{C}_{36}\text{H}_{24}\text{N}_{48}\text{Co}_6$ : C, 29.17; H, 1.63; N, 45.35. Found: C, 29.18; H, 1.62; N, 45.32. IR bands ( $\text{cm}^{-1}$ ): 2106 s, 2073 s, 1622 s, 1449 m, 1367 m, 1286 m, 1005 m, 837 m, 765 m, 714 s, 545 m.

**Crystal Data Collection and Refinement** Diffraction data were collected at 298 K on a Bruker Apex II CCD area detector equipped with graphite-monochromated Mo  $K\alpha$  radiation ( $\lambda = 0.71073$  Å). Empirical absorption corrections were applied using the SADABS program.[1] The structures were solved by the direct method and refined by the full-matrix least-squares method on  $F^2$ , with all non-hydrogen atoms refined with anisotropic thermal parameters.[2] All the hydrogen atoms attached to carbon atoms were placed in calculated positions and refined using the riding model. All calculations were carried out with the SHELXTL crystallographic software.

#### References

1. Sheldrick, G. M. *Program for Empirical Absorption Correction of Area Detector Data*; University of Göttingen, Germany, **1996**.
2. Sheldrick, G. M. *SHELXTL* Version 5.1. Bruker Analytical X-ray Instruments Inc., Madison, Wisconsin, USA, **1998**.

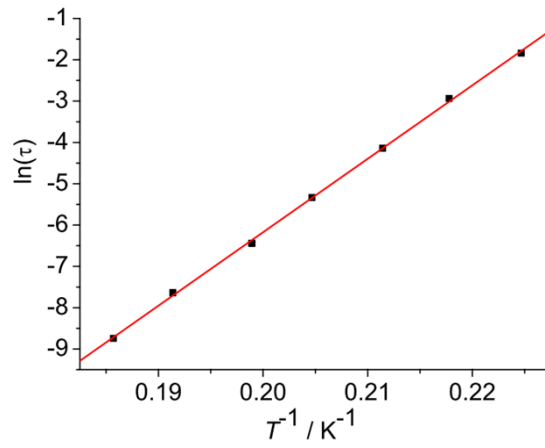

**Figure S1.** Arrhenius plots and best linear fits for **1** at zero dc field (solid squares).

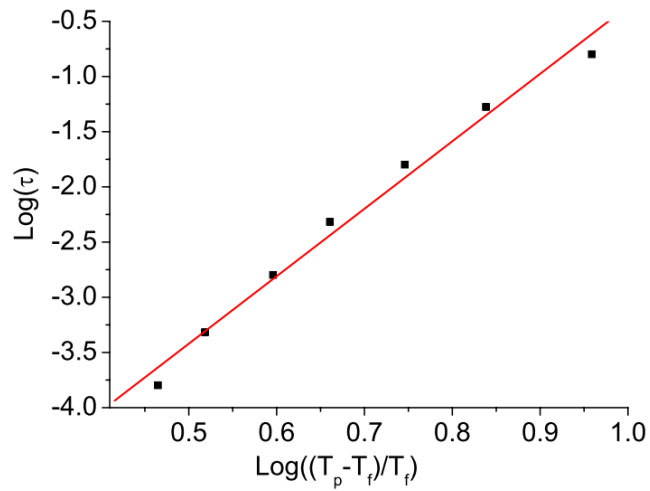

**Figure S2.** Frequency dependence of  $\chi'$  for **1** was fitted by the conventional critical scaling law of the spin dynamics.
